# Supplementary material
Source: Springer Nature journal article supplement (https://www.springermedizin.de/resource/supplementary/12889_2010_4628_MOESM1_ESM.pdf/9491438)

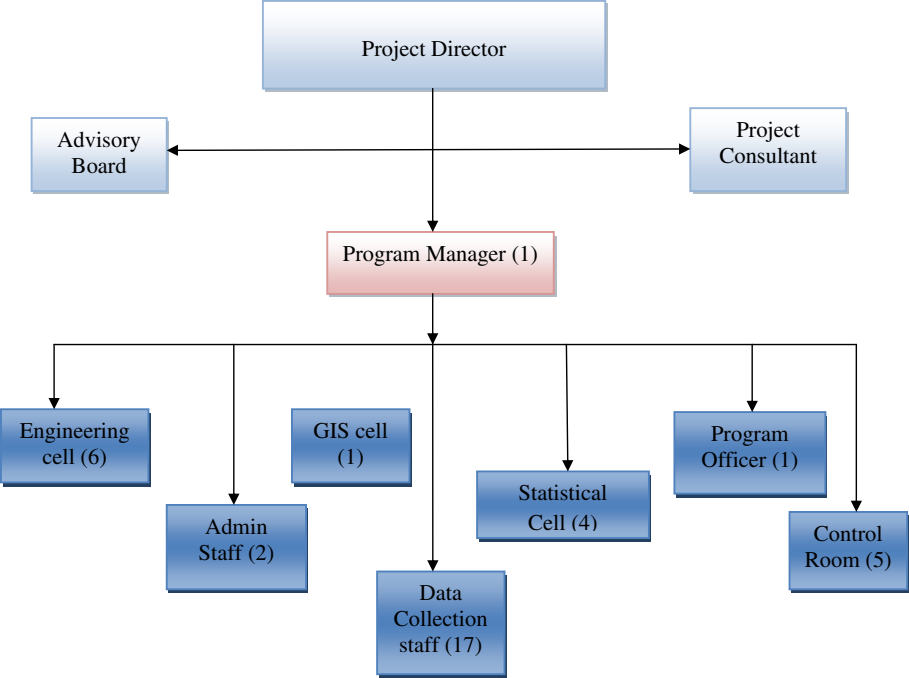

Supplement: MOESM1 [file 9491438]
